# Supplementary material for: Genetic and Association Mapping Study of Wheat Agronomic Traits Under Contrasting Water Regimes
Source: Int J Mol Sci. 2012 May 18;13(5):6167–88. doi: 10.3390/ijms13056167 (PMC3382799; doi:10.3390/ijms13056167)

# Supplementary Materials

**Supplementary Table 1.** REML variance of components ( $\pm$  standard errors) of 24 wheat agronomic quantitative traits.

| <b>Trait</b> | $\sigma_{rep(E)}^2$ | $\sigma_G^2$     | $\sigma_E^2$      | $\sigma_{GE}^2$  | $\sigma_e^2$     |
|--------------|---------------------|------------------|-------------------|------------------|------------------|
| DTH          | 0.05 $\pm$ 0.03     | 31.5 $\pm$ 4.6   | 22.3 $\pm$ 11.2   | 3.01 $\pm$ 0.17  | 0.46 $\pm$ 0.02  |
| DTF          | 0.08 $\pm$ 0.04     | 27.8 $\pm$ 4.1   | 29.1 $\pm$ 14.6   | 3.12 $\pm$ 0.17  | 0.55 $\pm$ 0.027 |
| HF           | 0.002 $\pm$ 0.002   | 0.90 $\pm$ 0.15  | 1.21 $\pm$ 0.61   | 0.87 $\pm$ 0.05  | 0.14 $\pm$ 0.007 |
| SH           | 0.006 $\pm$ 0.009   | 341.1 $\pm$ 50.1 | 119.3 $\pm$ 59.8  | 38.9 $\pm$ 2.0   | 1.35 $\pm$ 0.06  |
| PL           | 0.010 $\pm$ 0.012   | 59.9 $\pm$ 8.9   | 26.3 $\pm$ 16.7   | 8.0 $\pm$ 0.5    | 1.12 $\pm$ 0.06  |
| PE           | 0.001 $\pm$ 0.006   | 36.3 $\pm$ 5.4   | 13.8 $\pm$ 8.7    | 7.01 $\pm$ 0.48  | 0.92 $\pm$ 0.05  |
| PT           | 0.001 $\pm$ 0.001   | 1.3 $\pm$ 0.2    | 3.2 $\pm$ 1.6     | 0.7 $\pm$ 0.04   | 0.08 $\pm$ 0.04  |
| SL           | 0.006 $\pm$ 0.005   | 22.6 $\pm$ 3.3   | 2.2 $\pm$ 1.1     | 1.6 $\pm$ 0.1    | 0.5 $\pm$ 0.2    |
| SD           | 0.003 $\pm$ 0.003   | 16.0 $\pm$ 2.0   | 0.05 $\pm$ 0.03   | 1.5 $\pm$ 0.1    | 0.3 $\pm$ 0.1    |
| FSS          | 0.002 $\pm$ 0.002   | 4.0 $\pm$ 0.59   | 1.65 $\pm$ 0.83   | 0.93 $\pm$ 0.05  | 0.19 $\pm$ 0.01  |
| SSS          | 0.003 $\pm$ 0.007   | 25.8 $\pm$ 3.8   | 2.6 $\pm$ 1.3     | 3.3 $\pm$ 0.2    | 1.1 $\pm$ 0.05   |
| KS           | 0.034 $\pm$ 0.025   | 53.4 $\pm$ 7.9   | 23.5 $\pm$ 11.8   | 12.3 $\pm$ 0.6   | 1.88 $\pm$ 0.09  |
| KSL          | 0.009 $\pm$ 0.009   | 14.0 $\pm$ 2.0   | 4.0 $\pm$ 2.0     | 4.0 $\pm$ 0.2    | 0.9 $\pm$ 0.4    |
| KN           | 5.47 $\pm$ 4.29     | 7783 $\pm$ 1219  | 26970 $\pm$ 13515 | 5392 $\pm$ 2856  | 347 $\pm$ 17     |
| TKW          | 0.03 $\pm$ 0.02     | 25.5 $\pm$ 3.8   | 8.48 $\pm$ 4.28   | 5.57 $\pm$ 0.30  | 0.59 $\pm$ 0.03  |
| BPP          | 0.003 $\pm$ 0.005   | 10.3 $\pm$ 1.6   | 49.4 $\pm$ 24.7   | 7.9 $\pm$ 0.4    | 0.78 $\pm$ 0.04  |
| HI           | 0.013 $\pm$ 0.000   | 30.0 $\pm$ 20.0  | 6.0 $\pm$ 3.0     | 7.0 $\pm$ 4.0    | 0.80 $\pm$ 0.04  |
| PPS          | 0.007 $\pm$ 0.005   | 9.0 $\pm$ 1.0    | 6.0 $\pm$ 3.0     | 2.3 $\pm$ 0.1    | 0.34 $\pm$ 0.01  |
| SI           | 0.00 $\pm$ 0.00     | 0.15 $\pm$ 0.02  | 0.02 $\pm$ 0.001  | 0.04 $\pm$ 0.003 | 0.04 $\pm$ 0.002 |
| LA           | 0.008 $\pm$ 0.019   | 30.2 $\pm$ 4.6   | 16.5 $\pm$ 13.6   | 6.1 $\pm$ 0.59   | 1.84 $\pm$ 0.13  |
| LW           | 0.028 $\pm$ 0.062   | 60.0 $\pm$ 9.3   | 23.0 $\pm$ 19.0   | 12 $\pm$ 1.2     | 5.7 $\pm$ 0.4    |
| CH1          | 0.003 $\pm$ 0.007   | 9.48 $\pm$ 1.50  | 3.99 $\pm$ 3.29   | 3.17 $\pm$ 0.29  | 0.66 $\pm$ 0.04  |
| GY           | 0.01 $\pm$ 0.007    | 15.1 $\pm$ 2.3   | 44.3 $\pm$ 22.2   | 7.7 $\pm$ 0.4    | 0.42 $\pm$ 0.02  |

**Supplementary Table 2.** List of 96 wheat accessions, their origin and membership corresponding to each of the four subpopulation.

| Accession         | Origin        | Membership of Accession Corresponding to<br>Each Subpopulation |       |       |       |
|-------------------|---------------|----------------------------------------------------------------|-------|-------|-------|
|                   |               | A                                                              | B     | C     | D     |
| Acciaio           | Italy         | 0.815                                                          | 0.008 | 0.043 | 0.134 |
| Ai-bian           | Japan         | 0.315                                                          | 0.010 | 0.672 | 0.003 |
| Al Kan Tzao       | China         | 0.063                                                          | 0.071 | 0.811 | 0.055 |
| Ana               | Croatia       | 0.314                                                          | 0.015 | 0.610 | 0.061 |
| Avalon            | Great Britain | 0.003                                                          | 0.973 | 0.005 | 0.019 |
| Bankuty 1205      | Hungary       | 0.051                                                          | 0.002 | 0.006 | 0.941 |
| BCD 1302/83       | Madagascar    | 0.974                                                          | 0.006 | 0.003 | 0.017 |
| Benni multifloret | USA           | 0.075                                                          | 0.005 | 0.623 | 0.297 |
| Bezostaya 1       | Russia        | 0.985                                                          | 0.006 | 0.005 | 0.004 |
| Brigand           | Great Britain | 0.003                                                          | 0.993 | 0.003 | 0.002 |
| Cajeme 71         | Mexico        | 0.671                                                          | 0.013 | 0.122 | 0.194 |
| Capelle Desprez   | France        | 0.003                                                          | 0.990 | 0.004 | 0.003 |
| Centurk           | USA           | 0.047                                                          | 0.007 | 0.006 | 0.940 |
| Ching-Chang 6     | China         | 0.036                                                          | 0.009 | 0.943 | 0.012 |
| Cook              | Australia     | 0.978                                                          | 0.005 | 0.007 | 0.010 |
| Donska polupat.   | Russia        | 0.835                                                          | 0.098 | 0.062 | 0.005 |
| Durin             | France        | 0.085                                                          | 0.910 | 0.003 | 0.002 |
| F 4 4687          | Romania       | 0.236                                                          | 0.046 | 0.704 | 0.014 |
| Florida           | USA           | 0.734                                                          | 0.159 | 0.009 | 0.099 |
| Gala              | Argentina     | 0.983                                                          | 0.004 | 0.005 | 0.008 |
| HAYS 2            | USA           | 0.124                                                          | 0.075 | 0.774 | 0.028 |
| Helios            | USA           | 0.188                                                          | 0.363 | 0.066 | 0.383 |
| Highbury          | Great Britain | 0.012                                                          | 0.018 | 0.932 | 0.038 |
| Hira              | India         | 0.056                                                          | 0.005 | 0.729 | 0.210 |
| Holly E           | USA           | 0.228                                                          | 0.202 | 0.035 | 0.535 |
| Hope              | USA           | 0.454                                                          | 0.006 | 0.005 | 0.535 |
| Inia 66           | Mexico        | 0.437                                                          | 0.008 | 0.411 | 0.144 |
| INTRO 615         | USA           | 0.007                                                          | 0.026 | 0.962 | 0.005 |
| Ivanka            | Serbia        | 0.948                                                          | 0.035 | 0.011 | 0.006 |
| Kite              | Australia     | 0.006                                                          | 0.270 | 0.270 | 0.455 |
| L 1/91            | Serbia        | 0.560                                                          | 0.006 | 0.425 | 0.010 |
| L 1A/91           | Serbia        | 0.619                                                          | 0.005 | 0.365 | 0.011 |
| L-1               | Hungary       | 0.164                                                          | 0.138 | 0.694 | 0.004 |
| Lambriego Inia    | Chile         | 0.003                                                          | 0.538 | 0.014 | 0.444 |
| Lr 10             | USA           | 0.003                                                          | 0.002 | 0.002 | 0.992 |
| Lr 12             | USA           | 0.168                                                          | 0.004 | 0.003 | 0.825 |
| Magnif 41         | Argentina     | 0.458                                                          | 0.061 | 0.443 | 0.038 |
| Mex. 17 bb        | Mexico        | 0.035                                                          | 0.024 | 0.710 | 0.232 |
| Mex. 3            | Mexico        | 0.021                                                          | 0.098 | 0.561 | 0.320 |
| Mexico 120        | Australia     | 0.004                                                          | 0.003 | 0.967 | 0.025 |

Supplementary Table 2. Cont.

|                     |               |       |       |       |       |
|---------------------|---------------|-------|-------|-------|-------|
| Mina                | Serbia        | 0.222 | 0.764 | 0.009 | 0.005 |
| Minister Dwarf      | Australia     | 0.003 | 0.992 | 0.003 | 0.002 |
| Mironovska 808      | Ukraine       | 0.857 | 0.131 | 0.003 | 0.009 |
| Nizija              | Serbia        | 0.868 | 0.005 | 0.109 | 0.018 |
| Norin 10            | USA           | 0.057 | 0.087 | 0.852 | 0.005 |
| Norin 10/Brev 14    | Japan         | 0.224 | 0.109 | 0.260 | 0.407 |
| Nov. Crvena         | Serbia        | 0.580 | 0.004 | 0.015 | 0.401 |
| Nova Banatka        | Serbia        | 0.750 | 0.006 | 0.003 | 0.242 |
| NS 22/92            | Serbia        | 0.952 | 0.033 | 0.010 | 0.005 |
| NS 33/90            | Serbia        | 0.866 | 0.007 | 0.123 | 0.004 |
| NS 46/90            | Serbia        | 0.917 | 0.054 | 0.018 | 0.011 |
| NS 55-25            | Serbia        | 0.854 | 0.003 | 0.003 | 0.141 |
| NS 559              | Serbia        | 0.249 | 0.315 | 0.433 | 0.003 |
| NS 602              | Serbia        | 0.109 | 0.073 | 0.806 | 0.012 |
| NS 63-24            | Serbia        | 0.875 | 0.078 | 0.024 | 0.024 |
| NS 66/92            | Serbia        | 0.914 | 0.073 | 0.007 | 0.006 |
| NS 74/95            | Serbia        | 0.447 | 0.355 | 0.057 | 0.141 |
| NS 79/90            | Serbia        | 0.935 | 0.013 | 0.026 | 0.026 |
| Peking 11           | China         | 0.004 | 0.006 | 0.006 | 0.984 |
| Phoenix             | USA           | 0.600 | 0.379 | 0.005 | 0.016 |
| PKB Krupna          | Serbia        | 0.986 | 0.003 | 0.004 | 0.007 |
| Pobeda              | Serbia        | 0.980 | 0.003 | 0.004 | 0.012 |
| Purdue 39120        | USA           | 0.003 | 0.003 | 0.002 | 0.992 |
| Purdue 5392         | USA           | 0.003 | 0.003 | 0.003 | 0.992 |
| Purdue/Loras        | USA           | 0.008 | 0.273 | 0.003 | 0.715 |
| Red Coat            | USA           | 0.006 | 0.013 | 0.004 | 0.978 |
| Rebensansa          | Serbia        | 0.833 | 0.004 | 0.002 | 0.161 |
| Rusalka             | Bulgaria      | 0.477 | 0.022 | 0.497 | 0.004 |
| Saitama 27          | Japan         | 0.011 | 0.005 | 0.973 | 0.012 |
| Sava                | Serbia        | 0.897 | 0.040 | 0.030 | 0.033 |
| Semillia Eligulata  | USA           | 0.003 | 0.287 | 0.706 | 0.004 |
| Siete Cerros        | Mexico        | 0.009 | 0.004 | 0.976 | 0.011 |
| Slavija             | Serbia        | 0.949 | 0.041 | 0.004 | 0.005 |
| Sofija              | Serbia        | 0.992 | 0.003 | 0.002 | 0.003 |
| Sonalika            | India         | 0.250 | 0.173 | 0.205 | 0.372 |
| Suwwon 92           | India         | 0.010 | 0.007 | 0.476 | 0.508 |
| Szegedi 768         | Hungary       | 0.006 | 0.006 | 0.527 | 0.461 |
| Tibet Dwarf         | Tibet         | 0.434 | 0.017 | 0.546 | 0.003 |
| Timson              | Australia     | 0.007 | 0.002 | 0.984 | 0.007 |
| TJB 990-15          | Great Britain | 0.004 | 0.988 | 0.004 | 0.004 |
| Tom Thumb           | Tibet         | 0.003 | 0.992 | 0.003 | 0.002 |
| Triple Dirk B       | Australia     | 0.992 | 0.002 | 0.003 | 0.002 |
| Triple Dirk B cont. | Australia     | 0.990 | 0.005 | 0.003 | 0.002 |
| Triple Dirk S       | Australia     | 0.009 | 0.025 | 0.945 | 0.022 |

**Supplementary Table 2. Cont.**

|                   |         |       |       |       |       |
|-------------------|---------|-------|-------|-------|-------|
| Tr. compactum     | Serbia  | 0.149 | 0.071 | 0.770 | 0.010 |
| Tr. sphaerococcum | USA     | 0.004 | 0.441 | 0.206 | 0.348 |
| UC 65680          | USA     | 0.254 | 0.004 | 0.735 | 0.007 |
| UPI 301           | India   | 0.006 | 0.099 | 0.841 | 0.053 |
| Vel               | USA     | 0.491 | 0.008 | 0.047 | 0.455 |
| Vireo S           | Mexico  | 0.003 | 0.005 | 0.697 | 0.296 |
| WWMCB 2           | USA     | 0.006 | 0.008 | 0.983 | 0.003 |
| ZG 1011           | Croatia | 0.002 | 0.004 | 0.992 | 0.002 |
| ZG 987/3          | Croatia | 0.003 | 0.004 | 0.991 | 0.002 |
| ZGK 238/82        | Croatia | 0.532 | 0.003 | 0.423 | 0.042 |
| ZGK 3/82          | Croatia | 0.005 | 0.006 | 0.984 | 0.004 |
| ZGKT 159/82       | Croatia | 0.006 | 0.008 | 0.980 | 0.006 |

**Supplementary Figure 1.** Heatmap of the genetic correlations between 24 wheat agronomic traits. The correspondence between colour scale and genetic correlation levels are presented on the right-hand side of the heatmap. Trait codes: BPP = above-ground biomass per plant; CH1 = flag leaf chlorophyll content at flowering date; CH2 = flag leaf chlorophyll content three weeks after flowering date; DTH = days to heading; DTF = days to flowering; FSS = fertile spikelets per spike; GY = grain yield; HF = days between heading and flowering; HI = harvest index; KN = number of kernels per m<sup>2</sup>; KS = number of kernels per spike; KSL = number of kernels per spikelet; LA = flag leaf area; LW = flag leaf width; PE = peduncle extrusion; PL = peduncle length; PPS = production per spike; PT = productive tillering; SD = spike density; SH = stem height; SI = spike index; SL = spike length; SSS = sterile spikelets per spike; TKW = one thousand grain weight.

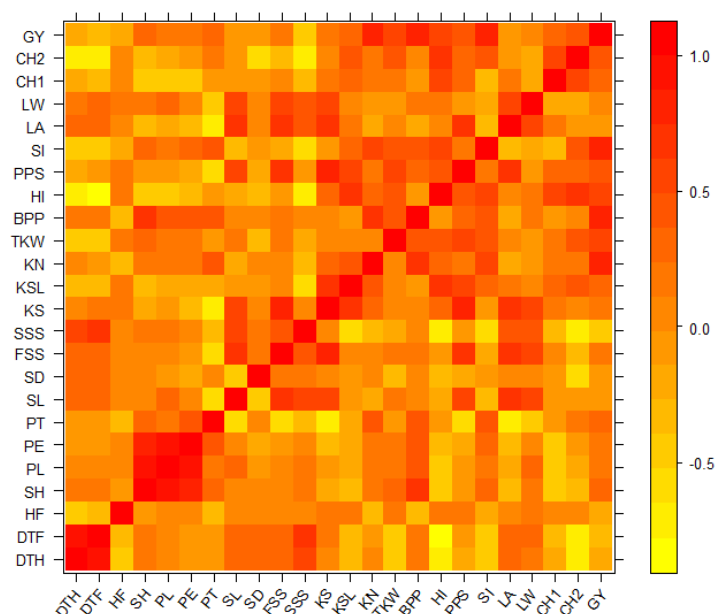

Supplement: Supplementary file 1 [file ijms-13-06167-s001.pdf]
